# Supplementary material for: An Association Study of HLA with the Kinetics of SARS-CoV-2 Spike Specific IgG Antibody Responses to BNT162b2 mRNA Vaccine
Source: MDPI journal article supplement (doi:10.3390/vaccines10040563), 2022-04-05
Supplement: s1 [file s1]

Supplementary Table S1 | Associational analysis of HLA-A, -C, -B, -DRB1, -DQB1, -DOA1 and -DPB1 alleles in 55 participants with no local adverse effect versus 33 participants with local adverse effect

| Locus | Two-field allele | No adverse effect (2n=110) % | Adverse effect (2n=66) % | OR (95%CI)       | P-value | Three-field allele | No adverse effect (2n=110) % | Adverse effect (2n=66) % | OR (95%CI)       | P-value | Four-field allele | No adverse effect (2n=110) % | Adverse effect (2n=66) % | OR (95%CI)       | P-value |
|-------|------------------|------------------------------|--------------------------|------------------|---------|--------------------|------------------------------|--------------------------|------------------|---------|-------------------|------------------------------|--------------------------|------------------|---------|
| A     | 02:06            | 15.5                         | 10.6                     | 0.65 (0.21-1.77) | 0.364   | 02:06:01           | 15.5                         | 10.6                     | 0.65 (0.21-1.77) | 0.364   | 02:06:01:01       | 11.8                         | 6.1                      | 0.48 (0.11-1.66) | 0.211   |
| A     | 11:01            | 10.9                         | 10.6                     | 0.97 (0.31-2.85) | 0.950   | 11:01:01           | 10.9                         | 10.6                     | 0.97 (0.31-2.85) | 0.950   | 11:01:01:01       | 10.9                         | 10.6                     | 0.97 (0.31-2.85) | 0.950   |
| A     | 24:02            | 34.5                         | 34.8                     | 1.01 (0.50-2.01) | 0.967   | 24:02:01           | 34.5                         | 34.8                     | 1.01 (0.50-2.01) | 0.967   | 24:02:01:01       | 32.7                         | 33.3                     | 1.03 (0.51-2.06) | 0.934   |
| A     | 31:01            | 7.3                          | 10.6                     | 1.51 (0.44-5.03) | 0.443   | 31:01:02           | 7.3                          | 10.6                     | 1.51 (0.44-5.03) | 0.443   | 31:01:02:01       | 6.4                          | 10.6                     | 1.75 (0.49-6.13) | 0.314   |
| A     | binned           | 31.8                         | 33.3                     | 1.07 (0.53-2.15) | 0.835   | binned             | 31.8                         | 33.3                     | 1.07 (0.53-2.15) | 0.835   | binned            | 38.2                         | 39.4                     | 1.05 (0.53-2.06) | 0.873   |
| C     | 01:02            | 16.4                         | 16.7                     | 1.02 (0.40-2.48) | 0.958   | 01:02:01           | 16.4                         | 16.7                     | 1.02 (0.40-2.48) | 0.958   | 01:02:01:01       | 12.7                         | 7.6                      | 0.56 (0.15-1.76) | 0.286   |
| C     | 03:03            | 9.1                          | 15.2                     | 1.79 (0.62-5.09) | 0.220   | 03:03:01           | 9.1                          | 15.2                     | 1.79 (0.62-5.09) | 0.220   | 03:03:01:01       | 9.1                          | 15.2                     | 1.79 (0.62-5.09) | 0.220   |
| C     | 03:04            | 12.7                         | 6.1                      | 0.44 (0.10-1.50) | 0.158   | 03:04:01           | 12.7                         | 6.1                      | 0.44 (0.10-1.50) | 0.158   | 03:04:01:02       | 12.7                         | 6.1                      | 0.44 (0.10-1.50) | 0.158   |
| C     | 07:02            | 10.9                         | 9.1                      | 0.82 (0.24-2.50) | 0.700   | 07:02:01           | 10.9                         | 9.1                      | 0.82 (0.24-2.50) | 0.700   |                   |                              |                          |                  |         |
| C     | 08:01            | 8.2                          | 9.1                      | 1.12 (0.31-3.73) | 0.834   | 08:01:01           | 8.2                          | 9.1                      | 1.12 (0.31-3.73) | 0.834   | 08:01:01:01       | 8.2                          | 9.1                      | 1.12 (0.31-3.73) | 0.834   |
| C     | 12:02            | 11.8                         | 15.2                     | 1.33 (0.49-3.53) | 0.525   | 12:02:02           | 10.9                         | 15.2                     | 1.46 (0.53-3.95) | 0.410   | 12:02:02:01       | 10.9                         | 15.2                     | 1.46 (0.53-3.95) | 0.410   |
| C     | binned           | 30.9                         | 28.8                     | 0.90 (0.43-1.85) | 0.766   | binned             | 31.8                         | 28.8                     | 0.87 (0.42-1.77) | 0.673   | binned            | 46.4                         | 47.0                     | 1.02 (0.53-1.98) | 0.938   |
| B     | 35:01            | 9.1                          | 10.6                     | 1.19 (0.36-3.67) | 0.742   | 35:01:01           | 9.1                          | 10.6                     | 1.19 (0.36-3.67) | 0.742   |                   |                              |                          |                  |         |
| B     | 40:02            | 11.8                         | 6.1                      | 0.48 (0.11-1.66) | 0.211   | 40:02:01           | 11.8                         | 6.1                      | 0.48 (0.11-1.66) | 0.211   | 40:02:01:01       | 10.0                         | 4.5                      | 0.43 (0.07-1.72) | 0.195   |
| B     | 51:01            | 10.0                         | 9.1                      | 0.90 (0.26-2.82) | 0.843   | 51:01:01           | 10.0                         | 9.1                      | 0.90 (0.26-2.82) | 0.843   |                   |                              |                          |                  |         |
| B     | 52:01            | 11.8                         | 15.2                     | 1.33 (0.49-3.53) | 0.525   | 52:01:01           | 11.8                         | 15.2                     | 1.33 (0.49-3.53) | 0.525   | 52:01:01:02       | 11.8                         | 15.2                     | 1.33 (0.49-3.53) | 0.525   |
| B     | binned           | 57.3                         | 59.1                     | 1.08 (0.56-2.10) | 0.813   | binned             | 57.3                         | 59.1                     | 1.08 (0.56-2.1)  | 0.813   | binned            | 78.2                         | 80.3                     | 1.14 (0.51-2.65) | 0.738   |
| DRB1  | 04:05            | 10.0                         | 10.6                     | 1.07 (0.33-3.21) | 0.898   | 04:05:01           | 10.0                         | 10.6                     | 1.07 (0.33-3.21) | 0.898   | 04:05:01:01       | 10.0                         | 10.6                     | 1.07 (0.33-3.21) | 0.898   |
| DRB1  | 09:01            | 16.4                         | 6.1                      | 0.33 (0.08-1.07) | 0.045   | 09:01:02           | 16.4                         | 6.1                      | 0.33 (0.08-1.07) | 0.045   | 09:01:02:01       | 16.4                         | 6.1                      | 0.33 (0.08-1.07) | 0.045   |
| DRB1  | 15:01            | 9.1                          | 12.1                     | 1.38 (0.45-4.12) | 0.521   | 15:01:01           | 9.1                          | 12.1                     | 1.38 (0.45-4.12) | 0.521   | 15:01:01:01       | 9.1                          | 10.6                     | 1.19 (0.36-3.67) | 0.742   |
| DRB1  | 15:02            | 10.0                         | 10.6                     | 1.07 (0.33-3.21) | 0.898   | 15:02:01           | 10.0                         | 10.6                     | 1.07 (0.33-3.21) | 0.898   | 15:02:01:01       | 10.0                         | 10.6                     | 1.07 (0.33-3.21) | 0.898   |
| DRB1  | binned           | 54.5                         | 60.6                     | 1.28 (0.66-2.51) | 0.432   | binned             | 54.5                         | 60.6                     | 1.28 (0.66-2.51) | 0.432   | binned            | 54.5                         | 62.1                     | 1.37 (0.70-2.68) | 0.325   |
| DQA1  | 01:02            | 13.6                         | 15.2                     | 1.13 (0.42-2.90) | 0.780   | 01:02:01           | 13.6                         | 13.6                     | 1.00 (0.36-2.63) | 1.000   | 01:02:01:01       | 9.1                          | 10.6                     | 1.19 (0.36-3.67) | 0.742   |
| DQA1  | 01:03            | 18.2                         | 18.2                     | 1.00 (0.41-2.35) | 1.000   | 01:03:01           | 18.2                         | 18.2                     | 1.00 (0.41-2.35) | 1.000   | 01:03:01:01       | 10.0                         | 13.6                     | 1.42 (0.49-4.02) | 0.462   |
| DQA1  | 01:04            | 10.0                         | 4.5                      | 0.43 (0.07-1.72) | 0.195   | 01:04:01           | 10.0                         | 4.5                      | 0.43 (0.07-1.72) | 0.195   | 01:04:01:01       | 10.0                         | 4.5                      | 0.43 (0.07-1.72) | 0.195   |
| DQA1  | 03:01            | 11.8                         | 13.6                     | 1.18 (0.42-3.19) | 0.724   | 03:01:01           | 11.8                         | 13.6                     | 1.18 (0.42-3.19) | 0.724   | 03:01:01:01       | 11.8                         | 13.6                     | 1.18 (0.42-3.19) | 0.724   |
| DQA1  | 03:02            | 18.2                         | 7.6                      | 0.37 (0.10-1.09) | 0.051   | 03:02:01           | 18.2                         | 7.6                      | 0.37 (0.10-1.09) | 0.051   | 03:02:01:01       | 17.3                         | 7.6                      | 0.39 (0.11-1.17) | 0.070   |
| DQA1  | 03:03            | 13.6                         | 12.1                     | 0.87 (0.30-2.36) | 0.773   | 03:03:01           | 13.6                         | 12.1                     | 0.87 (0.30-2.36) | 0.773   | 03:03:01:03       | 9.1                          | 10.6                     | 1.19 (0.36-3.67) | 0.742   |
| DQA1  | binned           | 14.5                         | 28.8                     | 2.38 (1.05-5.41) | 0.022   | binned             | 14.5                         | 30.3                     | 2.55 (1.13-5.79) | 0.012   | binned            | 32.7                         | 39.4                     | 1.34 (0.67-2.64) | 0.370   |
| DQB1  | 03:01            | 9.1                          | 15.2                     | 1.79 (0.62-5.09) | 0.220   | 03:01:01           | 9.1                          | 15.2                     | 1.79 (0.62-5.09) | 0.220   |                   |                              |                          |                  |         |
| DQB1  | 03:02            | 11.8                         | 13.6                     | 1.18 (0.42-3.19) | 0.724   | 03:02:01           | 11.8                         | 13.6                     | 1.18 (0.42-3.19) | 0.724   | 03:02:01:01       | 11.8                         | 13.6                     | 1.18 (0.42-3.19) | 0.724   |
| DQB1  | 03:03            | 17.3                         | 7.6                      | 0.39 (0.11-1.17) | 0.070   | 03:03:02           | 17.3                         | 7.6                      | 0.39 (0.11-1.17) | 0.070   | 03:03:02:02       | 17.3                         | 7.6                      | 0.39 (0.11-1.17) | 0.070   |
| DQB1  | 04:01            | 9.1                          | 10.6                     | 1.19 (0.36-3.67) | 0.742   | 04:01:01           | 9.1                          | 10.6                     | 1.19 (0.36-3.67) | 0.742   | 04:01:01:01       | 9.1                          | 10.6                     | 1.19 (0.36-3.67) | 0.742   |
| DQB1  | 06:01            | 18.2                         | 16.7                     | 0.90 (0.36-2.15) | 0.798   | 06:01:01           | 18.2                         | 16.7                     | 0.90 (0.36-2.15) | 0.798   | 06:01:01:01       | 18.2                         | 16.7                     | 0.90 (0.36-2.15) | 0.798   |
| DQB1  | 06:02            | 9.1                          | 10.6                     | 1.19 (0.36-3.67) | 0.742   | 06:02:01           | 9.1                          | 10.6                     | 1.19 (0.36-3.67) | 0.742   | 06:02:01:01       | 9.1                          | 10.6                     | 1.19 (0.36-3.67) | 0.742   |
| DQB1  | binned           | 25.5                         | 25.8                     | 1.02 (0.47-2.15) | 0.964   | binned             | 25.5                         | 25.8                     | 1.02 (0.47-2.15) | 0.964   | binned            | 34.5                         | 40.9                     | 1.31 (0.66-2.57) | 0.397   |
| DPA1  | 01:03            | 43.6                         | 40.9                     | 0.89 (0.46-1.73) | 0.723   | 01:03:01           | 43.6                         | 40.9                     | 0.89 (0.46-1.73) | 0.723   | 01:03:01:01       | 30.9                         | 22.7                     | 0.66 (0.30-1.39) | 0.241   |
| DPA1  |                  |                              |                          |                  |         |                    |                              |                          |                  |         | 01:03:01:05       | 9.1                          | 13.6                     | 1.58 (0.53-4.60) | 0.347   |
| DPA1  | 02:01            | 14.5                         | 21.2                     | 1.58 (0.66-3.76) | 0.255   | 02:01:01           | 14.5                         | 21.2                     | 1.58 (0.66-3.76) | 0.255   | 02:01:01:02       | 9.1                          | 19.7                     | 2.45 (0.92-6.67) | 0.043   |
| DPA1  | 02:02            | 41.8                         | 37.9                     | 0.85 (0.43-1.66) | 0.606   | 02:02:02           | 41.8                         | 37.9                     | 0.85 (0.43-1.66) | 0.606   | 02:02:02:01       | 41.8                         | 37.9                     | 0.85 (0.43-1.66) | 0.606   |
| DPA1  |                  |                              |                          |                  |         |                    |                              |                          |                  |         | binned            | 9.1                          | 6.1                      | 0.65 (0.14-2.36) | 0.472   |
| DPB1  | 02:01            | 26.4                         | 18.2                     | 0.62 (0.27-1.39) | 0.214   | 02:01:02           | 26.4                         | 18.2                     | 0.62 (0.27-1.39) | 0.214   | 02:01:02:01       | 20.9                         | 15.2                     | 0.68 (0.27-1.61) | 0.343   |
| DPB1  | 04:02            | 9.1                          | 13.6                     | 1.58 (0.53-4.60) | 0.347   | 04:02:01           | 9.1                          | 13.6                     | 1.58 (0.53-4.60) | 0.347   | 04:02:01:02       | 9.1                          | 12.1                     | 1.38 (0.45-4.12) | 0.521   |
| DPB1  | 05:01            | 36.4                         | 37.9                     | 1.07 (0.54-2.10) | 0.840   | 05:01:01           | 36.4                         | 37.9                     | 1.07 (0.54-2.10) | 0.840   | 05:01:01:01       | 31.8                         | 28.8                     | 0.87 (0.42-1.77) | 0.673   |
| DPB1  | 09:01            | 7.3                          | 15.2                     | 2.28 (0.76-7.02) | 0.095   | 09:01:01           | 7.3                          | 15.2                     | 2.28 (0.76-7.02) | 0.095   | 09:01:01          | 7.3                          | 15.2                     | 2.28 (0.76-7.02) | 0.095   |
| DPB1  | binned           | 20.9                         | 15.2                     | 0.68 (0.27-1.61) | 0.343   | binned             | 20.9                         | 15.2                     | 0.68 (0.27-1.61) | 0.343   | binned            | 30.9                         | 28.8                     | 0.90 (0.43-1.85) | 0.766   |

Supplementary Table S2 | Associational analysis of HLA-A, -C, -B, -DRB1, -DQB1, -DOA1 and -DPB1 alleles in 70 participants with fever versus 18 participants with fever more than 38°C

| Locus | Two-field allele | No fever (2n=140) % | Fever (>38°C) (2n=36) % | OR (95%CI)       | p-value | Three-field allele | No fever (2n=140) % | Fever (>38°C) (2n=36) % | OR (95%CI)       | p-value | Four-field allele | No fever (2n=140) % | Fever (>38°C) (2n=36) % | OR (95%CI)       | p-value |
|-------|------------------|---------------------|-------------------------|------------------|---------|--------------------|---------------------|-------------------------|------------------|---------|-------------------|---------------------|-------------------------|------------------|---------|
| A     | 02:06            | 13.6                | 16.7                    | 1.27 (0.38-3.69) | 0.635   | 02:06:01           | 13.6                | 16.7                    | 1.27 (0.38-3.69) | 0.635   |                   |                     |                         |                  |         |
| A     | 24:02            | 36.4                | 27.8                    | 0.67 (0.27-1.58) | 0.331   | 24:02:01           | 36.4                | 27.8                    | 0.67 (0.27-1.58) | 0.331   | 24:02:01:01       | 33.6                | 27.8                    | 0.76 (0.30-1.80) | 0.508   |
| A     | binned           | 50.0                | 55.6                    | 1.25 (0.56-2.81) | 0.552   | binned             | 50.0                | 55.6                    | 1.25 (0.56-2.81) | 0.552   | binned            | 66.4                | 72.2                    | 1.31 (0.55-3.31) | 0.508   |
| C     | 01:02            | 17.1                | 13.9                    | 0.78 (0.22-2.32) | 0.639   | 01:02:01           | 17.1                | 13.9                    | 0.78 (0.22-2.32) | 0.639   |                   |                     |                         |                  |         |
| C     | binned           | 82.9                | 86.1                    | 1.28 (0.43-4.65) | 0.639   | binned             | 82.9                | 86.1                    | 1.28 (0.43-4.65) | 0.639   | binned            | 100.0               | 100.0                   | NA               | NA      |
| B     | binned           | 100.0               | 100.0                   | NA               | NA      | binned             | 100.0               | 100.0                   | NA               | NA      | binned            | 100.0               | 100.0                   | NA               | NA      |
| DRB1  | binned           | 100.0               | 100.0                   | NA               | NA      | binned             | 100.0               | 100.0                   | NA               | NA      | binned            | 100.0               | 100.0                   | NA               | NA      |
| DQA1  | 01:02            | 13.6                | 16.7                    | 1.27 (0.38-3.69) | 0.635   |                    |                     |                         |                  |         |                   |                     |                         |                  |         |
| DQA1  | 01:03            | 20.7                | 11.1                    | 0.48 (0.11-1.52) | 0.188   | 01:03:01           | 20.7                | 11.1                    | 0.48 (0.11-1.52) | 0.188   |                   |                     |                         |                  |         |
| DQA1  | 03:02            | 15.0                | 11.1                    | 0.71 (0.17-2.32) | 0.551   | 03:02:01           | 15.0                | 11.1                    | 0.71 (0.17-2.32) | 0.551   |                   |                     |                         |                  |         |
| DQA1  | binned           | 50.7                | 61.1                    | 1.53 (0.68-3.50) | 0.265   | binned             | 64.3                | 77.8                    | 1.94 (0.78-5.3)  | 0.125   | binned            | 100.0               | 100.0                   | NA               | NA      |
| DQB1  | 06:01            | 20.0                | 11.1                    | 0.50 (0.12-1.59) | 0.217   | 06:01:01           | 20.0                | 11.1                    | 0.50 (0.12-1.59) | 0.217   | 06:01:01:01       | 20.0                | 11.1                    | 0.50 (0.12-1.59) | 0.217   |
| DQB1  | binned           | 80.0                | 88.9                    | 2.00 (0.63-8.39) | 0.217   | binned             | 80.0                | 88.9                    | 2.00 (0.63-8.39) | 0.217   | binned            | 80.0                | 88.9                    | 2.00 (0.63-8.39) | 0.217   |
| DPA1  | 01:03            | 42.9                | 38.9                    | 0.85 (0.37-1.90) | 0.667   | 01:03:01           | 42.9                | 38.9                    | 0.85 (0.37-1.90) | 0.667   | 01:03:01:01       | 28.6                | 25.0                    | 0.83 (0.32-2.03) | 0.670   |
| DPA1  | 02:01            | 17.1                | 16.7                    | 0.97 (0.30-2.72) | 0.946   | 02:01:01           | 17.1                | 16.7                    | 0.97 (0.30-2.72) | 0.946   |                   |                     |                         |                  |         |
| DPA1  | 02:02            | 40.0                | 44.4                    | 1.20 (0.53-2.67) | 0.629   | 02:02:02           | 40.0                | 44.4                    | 1.20 (0.53-2.67) | 0.629   | 02:02:02:01       | 40.0                | 44.4                    | 1.20 (0.53-2.67) | 0.629   |
| DPA1  |                  |                     |                         |                  |         |                    |                     |                         |                  |         | binned            | 31.4                | 30.6                    | 0.96 (0.39-2.24) | 0.920   |
| DPB1  | 02:01            | 24.3                | 19.4                    | 0.75 (0.26-1.97) | 0.540   | 02:01:02           | 24.3                | 19.4                    | 0.75 (0.26-1.97) | 0.540   | 02:01:02:01       | 18.6                | 19.4                    | 1.06 (0.35-2.83) | 0.905   |
| DPB1  | 05:01            | 36.4                | 38.9                    | 1.11 (0.48-2.50) | 0.785   | 05:01:01           | 36.4                | 38.9                    | 1.11 (0.48-2.50) | 0.785   | 05:01:01:01       | 31.4                | 27.8                    | 0.84 (0.33-1.99) | 0.672   |
| DPB1  | binned           | 39.3                | 41.7                    | 1.10 (0.48-2.47) | 0.795   | binned             | 39.3                | 41.7                    | 1.10 (0.48-2.47) | 0.795   | binned            | 50.0                | 52.8                    | 1.12 (0.50-2.50) | 0.766   |

Supplementary Table S3 | Associational analysis of HLA-A, -C, -B, -DRB1, -DQB1, -DOA1 and -DPB1 alleles in 55 participants with no systemic adverse effect versus 33 participants with systemic adverse effect

| Locus       | Two-field allele | No adverse effect (n=64) % | With adverse effect (n=112) % | OR (95%CI)              | p-value      | Three-field allele | No adverse effect (n=64) % | With adverse effect (n=112) % | OR (95%CI)              | p-value      | Four-field allele  | No adverse effect (n=64) % | With adverse effect (n=112) % | OR (95%CI)              | p-value      |
|-------------|------------------|----------------------------|-------------------------------|-------------------------|--------------|--------------------|----------------------------|-------------------------------|-------------------------|--------------|--------------------|----------------------------|-------------------------------|-------------------------|--------------|
| A           | 02:06            | 15.6                       | 12.5                          | 0.77 (0.30-2.09)        | 0.561        | 02:06:01           | 15.6                       | 12.5                          | 0.77 (0.30-2.09)        | 0.561        | 02:06:01:01        | 12.5                       | 8.0                           | 0.61 (0.20-1.94)        | 0.335        |
| A           | 11:01            | 10.9                       | 10.7                          | 0.98 (0.33-3.11)        | 0.963        | 11:01:01           | 10.9                       | 10.7                          | 0.98 (0.33-3.11)        | 0.963        | 11:01:01:01        | 10.9                       | 10.7                          | 0.98 (0.33-3.11)        | 0.963        |
| A           | 24:02            | 35.9                       | 33.9                          | 0.92 (0.46-1.84)        | 0.788        | 24:02:01           | 35.9                       | 33.9                          | 0.92 (0.46-1.84)        | 0.788        | 24:02:01:01        | 34.4                       | 32.1                          | 0.90 (0.45-1.84)        | 0.762        |
| A           | 31:01            | 10.9                       | 7.1                           | 0.63 (0.19-2.15)        | 0.386        | 31:01:02           | 10.9                       | 7.1                           | 0.63 (0.19-2.15)        | 0.386        | 31:01:02:01        | 9.4                        | 7.1                           | 0.74 (0.21-2.74)        | 0.599        |
| A           | binned           | 26.6                       | 35.7                          | 1.54 (0.75-3.23)        | 0.212        | binned             | 26.6                       | 35.7                          | 1.54 (0.75-3.23)        | 0.212        | binned             | 32.8                       | 42.0                          | 1.48 (0.74-2.98)        | 0.230        |
| C           | 01:02            | 10.9                       | 19.6                          | 1.99 (0.76-5.86)        | 0.134        | 01:02:01           | 10.9                       | 19.6                          | 1.99 (0.76-5.86)        | 0.134        | 01:02:01:01        | 6.3                        | 13.4                          | 2.32 (0.69-10.01)       | 0.142        |
| C           | 03:03            | 18.8                       | 7.1                           | 0.33 (0.11-0.96)        | 0.020        | 03:03:01           | 18.8                       | 7.1                           | 0.33 (0.11-0.96)        | 0.020        | 03:03:01:01        | 18.8                       | 7.1                           | 0.33 (0.11-0.96)        | 0.020        |
| C           | 03:04            | 12.5                       | 8.9                           | 0.69 (0.23-2.13)        | 0.452        | 03:04:01           | 12.5                       | 8.9                           | 0.69 (0.23-2.13)        | 0.452        | 03:04:01:02        | 12.5                       | 8.9                           | 0.69 (0.23-2.13)        | 0.452        |
| C           | 07:02            | 12.5                       | 8.9                           | 0.69 (0.23-2.13)        | 0.452        | 07:02:01           | 12.5                       | 8.9                           | 0.69 (0.23-2.13)        | 0.452        |                    |                            |                               |                         |              |
| C           | 08:01            | 6.3                        | 9.8                           | 1.63 (0.46-7.33)        | 0.414        | 08:01:01           | 6.3                        | 9.8                           | 1.63 (0.46-7.33)        | 0.414        | 08:01:01:01        | 6.3                        | 9.8                           | 1.63 (0.46-7.33)        | 0.414        |
| <b>C</b>    | <b>12:02</b>     | <b>20.3</b>                | <b>8.9</b>                    | <b>0.38 (0.14-1.03)</b> | <b>0.031</b> | <b>12:02:02</b>    | <b>18.8</b>                | <b>8.9</b>                    | <b>0.42 (0.15-1.16)</b> | <b>0.058</b> | <b>12:02:02:01</b> | <b>18.8</b>                | <b>8.9</b>                    | <b>0.42 (0.15-1.16)</b> | <b>0.058</b> |
| C           | binned           | 18.8                       | 36.6                          | 2.50 (1.15-5.73)        | 0.013        | binned             | 20.3                       | 36.6                          | 2.27 (1.05-5.08)        | 0.024        | binned             | 37.5                       | 51.8                          | 1.79 (0.91-3.53)        | 0.068        |
| B           | 35:01            | 12.5                       | 8.0                           | 0.61 (0.20-1.94)        | 0.335        | 35:01:01           | 12.5                       | 8.0                           | 0.61 (0.20-1.94)        | 0.335        |                    |                            |                               |                         |              |
| B           | 40:02            | 14.1                       | 7.1                           | 0.47 (0.15-1.47)        | 0.135        | 40:02:01           | 14.1                       | 7.1                           | 0.47 (0.15-1.47)        | 0.135        | 40:02:01:01        | 10.9                       | 6.3                           | 0.54 (0.15-1.92)        | 0.269        |
| B           | 51:01            | 6.3                        | 11.6                          | 1.97 (0.57-8.65)        | 0.247        | 51:01:01           | 6.3                        | 11.6                          | 1.97 (0.57-8.65)        | 0.247        |                    |                            |                               |                         |              |
| <b>B</b>    | <b>52:01</b>     | <b>20.3</b>                | <b>8.9</b>                    | <b>0.38 (0.14-1.03)</b> | <b>0.031</b> | <b>52:01:01</b>    | <b>20.3</b>                | <b>8.9</b>                    | <b>0.38 (0.14-1.03)</b> | <b>0.031</b> | <b>52:01:01:02</b> | <b>20.3</b>                | <b>8.9</b>                    | <b>0.38 (0.14-1.03)</b> | <b>0.031</b> |
| B           | binned           | 46.9                       | 64.3                          | 2.04 (1.04-4.00)        | 0.024        | binned             | 46.9                       | 64.3                          | 2.04 (1.04-4.00)        | 0.024        | binned             | 68.8                       | 84.8                          | 2.54 (1.13-5.69)        | 0.012        |
| DRB1        | 04:05            | 7.8                        | 11.6                          | 1.55 (0.49-5.82)        | 0.424        | 04:05:01           | 7.8                        | 11.6                          | 1.55 (0.49-5.82)        | 0.424        | 04:05:01:01        | 7.8                        | 11.6                          | 1.55 (0.49-5.82)        | 0.424        |
| DRB1        | 09:01            | 18.8                       | 8.9                           | 0.42 (0.15-1.16)        | 0.058        | 09:01:02           | 18.8                       | 8.9                           | 0.42 (0.15-1.16)        | 0.058        | 09:01:02:01        | 18.8                       | 8.9                           | 0.42 (0.15-1.16)        | 0.058        |
| DRB1        | 15:01            | 12.5                       | 8.9                           | 0.69 (0.23-2.13)        | 0.452        | 15:01:01           | 12.5                       | 8.9                           | 0.69 (0.23-2.13)        | 0.452        | 15:01:01:01        | 10.9                       | 8.9                           | 0.80 (0.26-2.62)        | 0.664        |
| DRB1        | 15:02            | 15.6                       | 7.1                           | 0.42 (0.13-1.25)        | 0.074        | 15:02:01           | 15.6                       | 7.1                           | 0.42 (0.13-1.25)        | 0.074        | 15:02:01:01        | 15.6                       | 7.1                           | 0.42 (0.13-1.25)        | 0.074        |
| DRB1        | binned           | 45.3                       | 63.4                          | 2.09 (1.07-4.09)        | 0.020        | binned             | 45.3                       | 63.4                          | 2.09 (1.07-4.09)        | 0.020        | binned             | 46.9                       | 63.4                          | 1.96 (1.00-3.84)        | 0.033        |
| DQA1        | 01:02            | 15.6                       | 13.4                          | 0.84 (0.33-2.23)        | 0.683        | 01:02:01           | 14.1                       | 13.4                          | 0.95 (0.36-2.62)        | 0.901        | 01:02:01:01        | 12.5                       | 8.0                           | 0.61 (0.20-1.94)        | 0.335        |
| DQA1        | 01:03            | 21.9                       | 16.1                          | 0.68 (0.29-1.62)        | 0.337        | 01:03:01           | 21.9                       | 16.1                          | 0.68 (0.29-1.62)        | 0.337        | 01:03:01:01        | 15.6                       | 8.9                           | 0.53 (0.19-1.52)        | 0.178        |
| DQA1        | 01:04            | 6.3                        | 8.9                           | 1.47 (0.4-6.69)         | 0.528        | 01:04:01           | 6.3                        | 8.9                           | 1.47 (0.40-6.69)        | 0.528        | 01:04:01:01        | 6.3                        | 8.9                           | 1.47 (0.40-6.69)        | 0.528        |
| DQA1        | 03:01            | 10.9                       | 13.4                          | 1.26 (0.45-3.87)        | 0.636        | 03:01:01           | 10.9                       | 13.4                          | 1.26 (0.45-3.87)        | 0.636        | 03:01:01:01        | 10.9                       | 13.4                          | 1.26 (0.45-3.87)        | 0.636        |
| <b>DQA1</b> | <b>03:02</b>     | <b>21.9</b>                | <b>9.8</b>                    | <b>0.39 (0.15-1.00)</b> | <b>0.028</b> | <b>03:02:01</b>    | <b>21.9</b>                | <b>9.8</b>                    | <b>0.39 (0.15-1.00)</b> | <b>0.028</b> | <b>03:02:01:01</b> | <b>21.9</b>                | <b>8.9</b>                    | <b>0.35 (0.13-0.92)</b> | <b>0.016</b> |
| DQA1        | 03:03            | 7.8                        | 16.1                          | 2.26 (0.75-8.17)        | 0.118        | 03:03:01           | 7.8                        | 16.1                          | 2.26 (0.75-8.17)        | 0.118        | 03:03:01:03        | 6.3                        | 11.6                          | 1.97 (0.57-8.65)        | 0.247        |
| DQA1        | binned           | 15.6                       | 22.3                          | 1.55 (0.66-3.91)        | 0.284        | binned             | 17.2                       | 22.3                          | 1.38 (0.60-3.38)        | 0.417        | binned             | 26.6                       | 40.2                          | 1.86 (0.91-3.89)        | 0.069        |
| DQB1        | 03:01            | 7.8                        | 13.4                          | 1.82 (0.59-6.73)        | 0.262        | 03:01:01           | 7.8                        | 13.4                          | 1.82 (0.59-6.73)        | 0.262        |                    |                            |                               |                         |              |
| DQB1        | 03:02            | 10.9                       | 13.4                          | 1.26 (0.45-3.87)        | 0.636        | 03:02:01           | 10.9                       | 13.4                          | 1.26 (0.45-3.87)        | 0.636        | 03:02:01:01        | 10.9                       | 13.4                          | 1.26 (0.45-3.87)        | 0.636        |
| DQB1        | 03:03            | 20.3                       | 9.8                           | 0.43 (0.16-1.12)        | 0.051        | 03:03:02           | 20.3                       | 9.8                           | 0.43 (0.16-1.12)        | 0.051        | 03:03:02:02        | 20.3                       | 9.8                           | 0.43 (0.16-1.12)        | 0.051        |
| DQB1        | 04:01            | 6.3                        | 11.6                          | 1.97 (0.57-8.65)        | 0.247        | 04:01:01           | 6.3                        | 11.6                          | 1.97 (0.57-8.65)        | 0.247        | 04:01:01:01        | 6.3                        | 11.6                          | 1.97 (0.57-8.65)        | 0.247        |
| DQB1        | 06:01            | 21.9                       | 15.2                          | 0.64 (0.27-1.53)        | 0.262        | 06:01:01           | 21.9                       | 15.2                          | 0.64 (0.27-1.53)        | 0.262        | 06:01:01:01        | 21.9                       | 15.2                          | 0.64 (0.27-1.53)        | 0.262        |
| DQB1        | 06:02            | 12.5                       | 8.0                           | 0.61 (0.20-1.94)        | 0.335        | 06:02:01           | 12.5                       | 8.0                           | 0.61 (0.20-1.94)        | 0.335        | 06:02:01:01        | 12.5                       | 8.0                           | 0.61 (0.20-1.94)        | 0.335        |
| DQB1        | binned           | 20.3                       | 28.6                          | 1.57 (0.72-3.57)        | 0.227        | binned             | 20.3                       | 28.6                          | 1.57 (0.72-3.57)        | 0.227        | binned             | 28.1                       | 42.0                          | 1.85 (0.91-3.82)        | 0.067        |
| DPA1        | 01:03            | 40.6                       | 43.8                          | 1.14 (0.58-2.23)        | 0.687        | 01:03:01           | 40.6                       | 43.8                          | 1.14 (0.58-2.23)        | 0.687        | 01:03:01:01        | 32.8                       | 25.0                          | 0.68 (0.33-1.43)        | 0.266        |
| DPA1        |                  |                            |                               |                         |              |                    |                            |                               |                         |              | 01:03:01:05        | 4.7                        | 14.3                          | 3.39 (0.91-18.79)       | 0.048        |
| DPA1        | 02:01            | 21.9                       | 14.3                          | 0.60 (0.25-1.44)        | 0.198        | 02:01:01           | 21.9                       | 14.3                          | 0.60 (0.25-1.44)        | 0.198        | 02:01:01:02        | 14.1                       | 12.5                          | 0.87 (0.33-2.45)        | 0.767        |
| DPA1        | 02:02            | 37.5                       | 42.0                          | 1.21 (0.61-2.39)        | 0.561        | 02:02:02           | 37.5                       | 42.0                          | 1.21 (0.61-2.39)        | 0.561        | 02:02:02:01        | 37.5                       | 42.0                          | 1.21 (0.61-2.39)        | 0.561        |
| DPA1        |                  |                            |                               |                         |              |                    |                            |                               |                         |              | binned             | 10.9                       | 6.3                           | 0.54 (0.15-1.92)        | 0.269        |
| <b>DPB1</b> | <b>02:01</b>     | <b>32.8</b>                | <b>17.9</b>                   | <b>0.45 (0.21-0.97)</b> | <b>0.024</b> | <b>02:01:02</b>    | <b>32.8</b>                | <b>17.9</b>                   | <b>0.45 (0.21-0.97)</b> | <b>0.024</b> | <b>02:01:02:01</b> | <b>25.0</b>                | <b>15.2</b>                   | <b>0.54 (0.23-1.25)</b> | <b>0.108</b> |
| DPB1        | 04:02            | 4.7                        | 14.3                          | 3.39 (0.91-18.79)       | 0.048        | 04:02:01           | 4.7                        | 14.3                          | 3.39 (0.91-18.79)       | 0.048        | 04:02:01:02        | 4.7                        | 13.4                          | 3.14 (0.84-17.54)       | 0.067        |
| DPB1        | 05:01            | 32.8                       | 39.3                          | 1.32 (0.66-2.68)        | 0.392        | 05:01:01           | 32.8                       | 39.3                          | 1.32 (0.66-2.68)        | 0.392        | 05:01:01:01        | 29.7                       | 31.3                          | 1.08 (0.53-2.24)        | 0.829        |
| DPB1        | 09:01            | 9.4                        | 10.7                          | 1.16 (0.38-3.97)        | 0.778        | 09:01:01           | 9.4                        | 10.7                          | 1.16 (0.38-3.97)        | 0.778        | 09:01:01           | 9.4                        | 10.7                          | 1.16 (0.38-3.97)        | 0.778        |
| DPB1        | binned           | 20.3                       | 17.9                          | 0.85 (0.37-2.03)        | 0.688        | binned             | 20.3                       | 17.9                          | 0.85 (0.37-2.03)        | 0.688        | binned             | 31.3                       | 29.5                          | 0.92 (0.45-1.91)        | 0.804        |
